# Supplementary material for: A transparent, stretchable, stable, self-adhesive ionogel-based strain sensor for human motion monitoring
Source: Royal Society of Chemistry journal article supplement (doi:10.1039/c9tc03797g), 2019-01-01
Supplement: c9tc03797g1.pdf [file c9tc03797g1.pdf]

## Transparent, stretchable, stable, self-adhesive ionogel-based strain sensor for human motion monitoring

Jingxian Sun, Yixin Yuan, Guoqiang Lu, Lingfeng Li, Xiaoqun Zhu\* and Jun Nie\*

State Key Laboratory of Chemical Resource Engineering, Beijing University of Chemical Technology, Beijing 100029, P. R. China.

E-mail: zhuxq@mail.buct.edu.cn; niejun@mail.buct.edu.cn

### Supporting Information

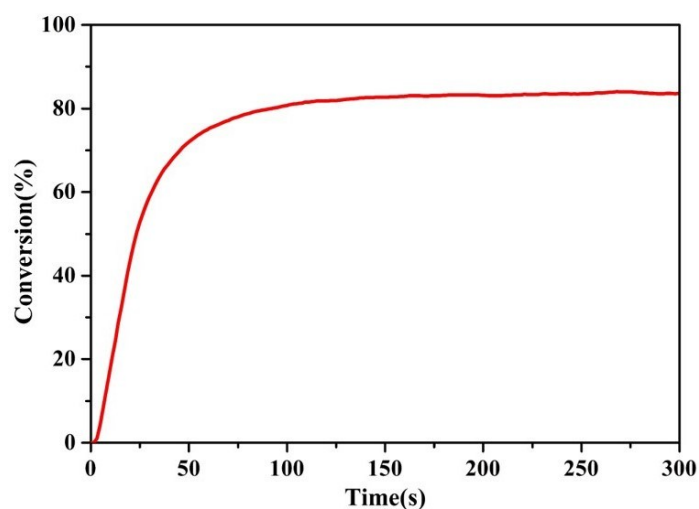

Fig. S1 Photopolymerization kinetics of the ionogel.

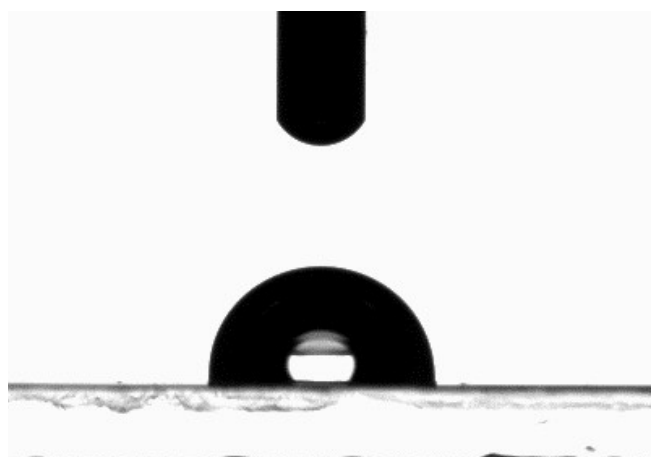

Fig. S2 Water contact angle measurement of the ionogel

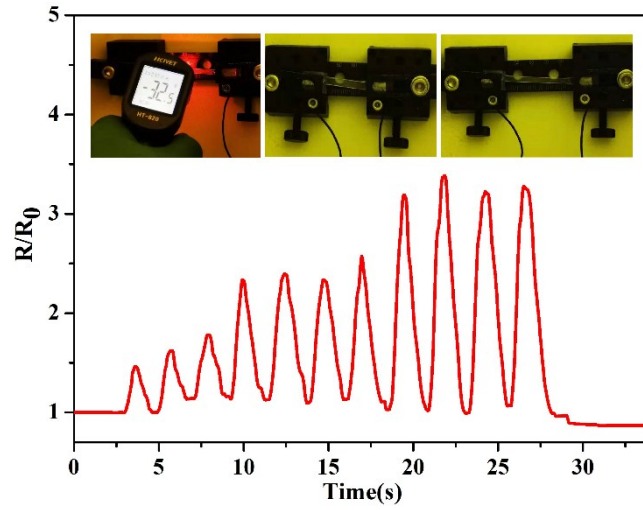

Fig. S3 Relative resistance change ( $R/R_0$ ) of the ionogel at  $-30\text{ °C}$

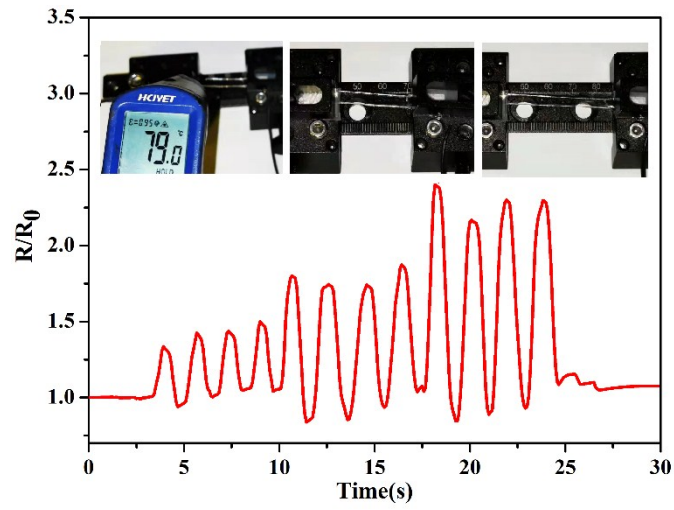

Fig. S4 Relative resistance change ( $R/R_0$ ) of the ionogel at  $80\text{ °C}$
